# Supplementary material
Source: publisher figshare collection journal article supplement (https://rs.figshare.com/ndownloader/files/9288751)
Supplement: Supplementary file 1 [file 9288751]

## Sheet: Barramundi MO2max fed vs unfed
Fish #	Body mass (g)	Treatment	Meal size (% of body mass)	MO2,max (mg/min/kg)
45	22.5	Fed	1.82	6.98
46	14.9	Fed	1.38	9.23
47	18.7	Fed	2.2	8.42
48	14.4	Fed	2.84	8.29
49	17.2	Fed	1.19	6.85
50	16.5	Fed	2.48	6.98
51	19.1	Unfed	0	8.69
52	14.5	Unfed	0	7.8
53	15.6	Unfed	0	7.79
54	12.5	Unfed	0	6.12
55	13.4	Unfed	0	8.77
56	16	Unfed	0	7.13
